# Supplementary material for: The effect of strontium ranelate on titanium particle-induced periprosthetic osteolysis regulated by WNT/β-catenin signaling in vivo and in vitro
Source: Oxford University Press journal article supplement (doi:10.1042/bsr20203003), 2021-01-01

**Table S1.** Primers used for RT-PCR

| Target | Forward primer (5'→3')  | Reverse primer (3'→5') | GenBank No. |
|--------|-------------------------|------------------------|-------------|
| Runx2  | F:CCTCTGACTTCTGCCTCTGG  | R:ATGAAATGCTTGGGAACTGC | NM_009820.5 |
| OCN    | F:CCATCTTTCTGCTCACTCTGC | R:ACCTTATTGCCCTCCTGCTT | NM_007541.3 |
| OPG    | F:GAGAAGCCACGCAAAAGTGT  | R:GGCAAACGTCCACCAAAC   | NM_008764.3 |
| RANKL  | F:AGGAGGGAGCACGAAAAACT  | R:AAGGGTTGGACACCTGAATG | NM_011613.3 |
| SOST   | F:CCTCATCTGCCTACTTGTGC  | R:ATGGTCTGGTTGTTCTCAGG | NM_024449.6 |
| GAPDH  | F:ACCCAGAAGACTGTGGATGG  | R:CACATTGGGGGTAGGAACAC | NM_008084.3 |

Note! *Runx2*: runt-related transcription factor 2; *OCN*: osteocalcin; *OPG*: osteoprotegerin; *RANKL*: receptor activator of unclar factor kappa-B ligand; *SOST*: sclerostin; *GAPDH*: glyceraldehydes 3-phosphate dehydrogenase.

**Fig.S1 Titanium particles and titanium nail used in this study. (A)** Scanning electron microscope images x500 (Scar bar = 100 $\mu$ m) or x5000 (Scar bar = 10 $\mu$ m). **(B)** Ti nail. **(C)** X-ray image of murine knee after surgery (Scar bar = 1.6mm), **(D)** skeletal formula of strontium ranelate.

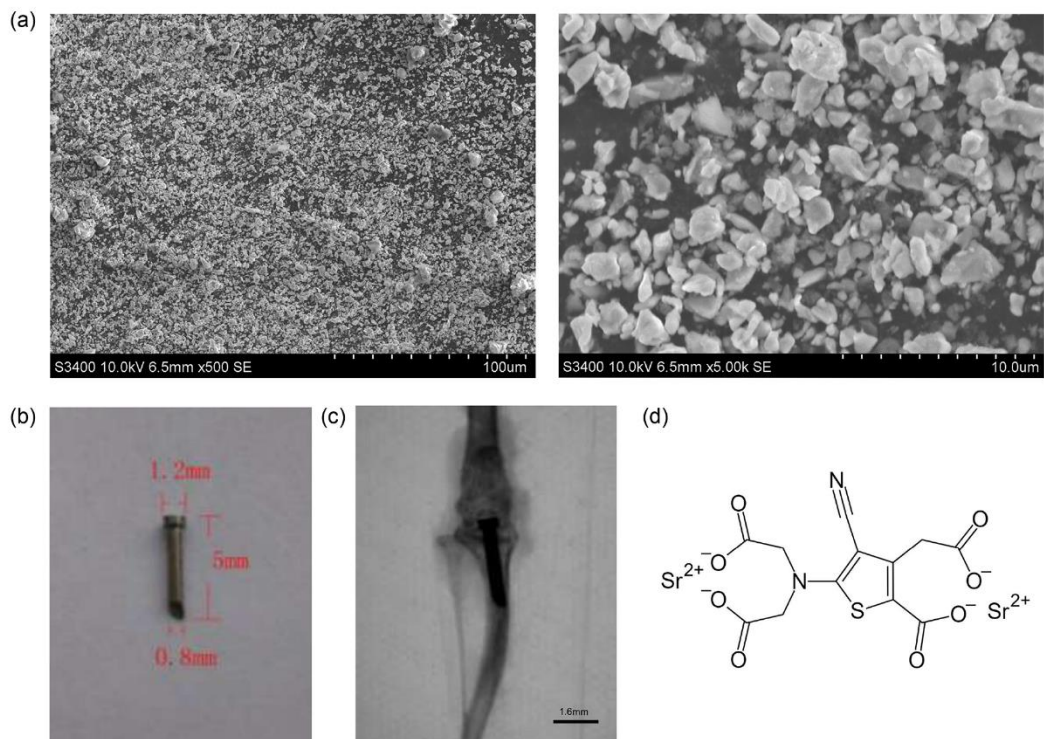

Supplement: bsr-2020-3003_supp.pdf [file bsr-2020-3003_supp.pdf]
